# Supplementary material for: Modulating the porosity of N-doped carbon materials for enhanced CO2 capture and methane uptake
Source: Royal Society of Chemistry journal article supplement (doi:10.1039/d4ta03273j), 2024-01-01
Supplement: d4ta03273j1.pdf [file d4ta03273j1.pdf]

*Supporting Information*

**Modulating the porosity of N-doped carbon materials for  
enhanced CO<sub>2</sub> capture and methane uptake**

Nawaf Albeladi,<sup>1,2</sup> and Robert Mokaya<sup>1,3\*</sup>

<sup>1</sup>School of Chemistry, University of Nottingham, University Park, Nottingham NG7 2RD, U. K.

<sup>2</sup>Taibah University, Yanbu Al Bahr, 46423, Saudi Arabia

<sup>3</sup>Department of Chemistry, Dainton Building, The University of Sheffield, Brook Hill, Sheffield  
S3 7HF, U. K.

*E-mail: r.mokaya@nottingham.ac.uk (R. Mokaya)*

Table S1. CO<sub>2</sub> uptake capacity of various porous carbons at 25 °C and 0.15 bar or 1 bar (The data in the table is adapted from reference 29 in main manuscript).

|                                                   | CO <sub>2</sub> uptake (mmol/g) |          | Reference |
|---------------------------------------------------|---------------------------------|----------|-----------|
|                                                   | 1 bar                           | 0.15 bar |           |
| Sawdust-derived activated carbon                  | 4.8                             | 1.2      | 1         |
| Petroleum pitch-derived activated carbon          | 4.55                            | ~1.0     | 2         |
| Activated carbon spheres                          | 4.55                            | ~1.1     | 3         |
| Phenolic resin activated carbon spheres           | 4.5                             | ~1.2     | 4         |
| Fungi-derived activated carbon                    | 3.5                             | ~1.0     | 5         |
| Chitosan-derived activated carbon                 | 3.86                            | ~1.1     | 6         |
| Polypyrrole derived activated carbon              | 3.9                             | ~1.0     | 7         |
| Soya bean derived N-doped activated carbon        | 4.24                            | 1.2      | 8         |
| N-doped ZTCs                                      | 4.4                             | ~1.0     | 9         |
| Activated templated N-doped carbon                | 4.5                             | 1.4      | 10        |
| Polyaniline derived activated carbon              | 4.3                             | 1.38     | 11        |
| N-doped activated carbon monoliths                | 5.14                            | 1.25     | 12        |
| Activated hierarchical N-doped carbon             | 4.8                             | 1.4      | 13        |
| Activated N-doped carbon from algae               | 4.5                             | ~1.1     | 14        |
| Compactivated carbons from sawdust                | 5.8                             | 2.0      | 15        |
| Fern-derived activated carbon                     | 5.67                            | ~1.7     | 16        |
| Compactivated carbons from polypyrrole            | 5.5                             | 2.1      | 17        |
| Clove-derived activated carbon                    | 5.4                             | 1.4      | 18        |
| Potassium oxalate-activated carbon from date seed | 5.0                             | 1.8      | 19        |
| Potassium phthalimide derived carbons             | 5.2                             | 1.7      | 20        |

## References

1. M. Sevilla and A. B. Fuertes, *Energy Environ. Sci.*, 2011, **4**, 1765.
2. J. Silvestre-Albero, A. Wahby, A. Sepulveda-Escribano, M. Martinez-Escandell, K. Kaneko and F. Rodriguez-Reinoso, *Chem. Commun.*, 2011, **47**, 6840.
3. N. P. Wickramaratne and M. Jaroniec, *ACS Appl. Mater. Interfaces*, 2013, **5**, 1849.
4. N. P. Wickramaratne and M. Jaroniec, *J. Mater. Chem. A*, 2013, **1**, 112.
5. J. Wang, et al, *J. Mater. Chem.*, 2012, **22**, 13911.
6. X. Fan, L. Zhang, G. Zhang, Z. Shu, J. Shi, *Carbon*, 2013, **61**, 423.
7. M. Sevilla, P. Valle-Vigon and A. B. Fuertes, *Adv. Funct. Mater.*, 2011, **21**, 2781.
8. W. Xing, et al, *Energy Environ. Sci.*, 2012, **5**, 7323.
9. Y. D. Xia, R. Mokaya, G. S. Walker and Y. Q. Zhu, *Adv. Energy Mater.*, 2011, **1**, 678.
10. Y. Zhao, L. Zhao, K. X. Yao, Y. Yang, Q. Zhang and Y. Han, *J. Mater. Chem.*, 2012, **22**, 19726.
11. Z. Zhang, et al, *Phys. Chem. Chem. Phys.*, 2013, **15**, 2523
12. M. Nandi, et al, *Chem. Commun.*, 2012, **48**, 10283.
13. D. Lee, C. Zhang, C. Wei, B. L. Ashfeld and H. Gao, *J. Mater. Chem. A*, 2013, **1**, 14862.
14. M. Sevilla, C. Falco, M. M. Titirici and A. B. Fuertes, *RSC Advances*, 2012, **2**, 12792.
15. N. Balahmar, A. C. Mitchell, and R. Mokaya, *Adv. Energy Mater.*, 2015, **5**, 1500867.
16. J. Serafin, K. Kiełbasa and, B. Michalkiewicz, *Chem. Eng. J.*, 2022, **429**, 131751.
17. B. Adeniran and R. Mokaya, *Nano Energy*, 2015, **16**, 173.
18. I. Alali and R. Mokaya, *Energy Environ. Sci.*, 2022, **15**, 4710.
19. A. Altwala and R. Mokaya, *RSC Adv.*, 2022, **12**, 20080.
20. I. Alali and R. Mokaya, *J. Mater. Chem. A*, 2023, **11**, 6952-6965.

Table S2. Methane uptake for the best performing N-doped activated carbons compared to selected benchmark MOFs and carbons reported in the literature. Volumetric uptake of powder

| Sample       | Density<br>(g cm <sup>-3</sup> ) | 65 bar<br>(g g <sup>-1</sup> ) (cm <sup>3</sup> cm <sup>-3</sup> ) |     | 80 bar<br>(g g <sup>-1</sup> ) (cm <sup>3</sup> cm <sup>-3</sup> ) |     | 100 bar<br>(g g <sup>-1</sup> ) (cm <sup>3</sup> cm <sup>-3</sup> ) |     | Reference |
|--------------|----------------------------------|--------------------------------------------------------------------|-----|--------------------------------------------------------------------|-----|---------------------------------------------------------------------|-----|-----------|
| DSM2800-1    | 0.65                             | 0.25                                                               | 230 | 0.27                                                               | 248 | 0.29                                                                | 266 | This work |
| DSM4700-1    | 0.59                             | 0.27                                                               | 219 | 0.29                                                               | 237 | 0.31                                                                | 256 | This work |
| DSU4800-1    | 0.41                             | 0.35                                                               | 197 | 0.39                                                               | 217 | 0.42                                                                | 239 | This work |
| PPI-800-2    | 0.92                             | 0.21                                                               | 270 | 0.22                                                               | 287 | 0.25                                                                | 309 | 1         |
| PPI-900-2    | 0.87                             | 0.23                                                               | 283 | 0.25                                                               | 303 | 0.28                                                                | 331 | 1         |
| PPI-1000-2   | 0.83                             | 0.25                                                               | 288 | 0.27                                                               | 311 | 0.29                                                                | 338 | 1         |
| CHCC2800     | 0.82                             | 0.26                                                               | 293 | 0.28                                                               | 315 | 0.30                                                                | 339 | 2         |
| CHCC4700     | 0.75                             | 0.27                                                               | 282 | 0.29                                                               | 306 | 0.32                                                                | 334 | 2         |
| CHCC4800     | 0.58                             | 0.32                                                               | 258 | 0.35                                                               | 279 | 0.38                                                                | 309 | 2         |
| CNL4800      | 0.67                             | 0.26                                                               | 241 | 0.29                                                               | 269 | 0.31                                                                | 291 | 3         |
| PPYCNL124    | 0.52                             | 0.30                                                               | 217 | 0.33                                                               | 238 | 0.36                                                                | 260 | 3         |
| PPYCNL214    | 0.36                             | 0.36                                                               | 183 | 0.41                                                               | 204 | 0.46                                                                | 229 | 3         |
| ACDS4800     | 0.69                             | 0.25                                                               | 243 | 0.27                                                               | 262 | 0.29                                                                | 282 | 3,4       |
| PPYSD114     | 0.47                             | 0.32                                                               | 211 | 0.35                                                               | 231 | 0.39                                                                | 254 | 4         |
| AX-21 carbon | 0.487                            | 0.30                                                               | 203 | 0.33                                                               | 222 | 0.35                                                                | 238 | 5         |
| HKUST-1      | 0.881                            | 0.21                                                               | 263 | 0.22                                                               | 272 | 0.23                                                                | 281 | 5         |
| Ni-MOF-74    | 1.195                            | 0.15                                                               | 259 | 0.16                                                               | 267 | 0.17                                                                | 277 | 5         |
| Al-soc-MOF-1 | 0.34                             | 0.41                                                               | 197 | 0.47                                                               | 222 |                                                                     |     | 6         |
| MOF-210      | 0.25                             | 0.41                                                               | 143 | 0.48                                                               | 168 |                                                                     |     | 7         |
| NU-1500-Al   | 0.498                            | 0.29                                                               | 200 | 0.31                                                               | 216 | 0.34                                                                | 237 | 8         |
| NU-1501-Fe   | 0.299                            | 0.40                                                               | 168 | 0.46                                                               | 193 | 0.52                                                                | 218 | 8         |
| NU-1501-Al   | 0.283                            | 0.41                                                               | 163 | 0.48                                                               | 190 | 0.54                                                                | 214 | 8         |
| monoHKUST-1  | 1.06                             | 0.17                                                               | 261 | 0.18                                                               | 278 | 0.18                                                                | 275 | 9         |
| monoUiO-66_D | 1.05                             | 0.14                                                               | 210 | 0.17                                                               | 245 | 0.20                                                                | 296 | 10        |

MOFs is calculated based on crystallographic density rather than packing density.

## References

1. I. Alali and R. Mokaya, *J. Mater. Chem. A*, 2023, **11**, 6952-6965.
2. I. Alali and R. Mokaya, *Energy Environ. Sci.*, 2022, **15**, 4710.
3. A. Altwala and R. Mokaya, *J. Mater. Chem. A*, 2022, **10**, 13744.
4. A. Altwala and R. Mokaya, *Energy Environ. Sci.*, 2020, **13**, 2967.
5. J. A. Mason, M. Veenstra and J. R. Long, *Chem. Sci.*, 2014, **5**, 32.
6. D. Alezi, *et al*, *J. Am. Chem. Soc.*, 2015, **137**, 13308.
7. H. Furukawa, *et al*, *Science* 2010, **329**, 424–428.
8. Z. Chen, *et al*, *Science*, 2020, **368**, 297.
9. T. Tian, Z. Zeng, D. Vulpe, M. E. Casco, G. Divitini, P. A. Midgley, J. Silvestre-Albero, J. C. Tan, P. Z. Moghadam and D. Fairen-Jimenez, *Nat. Mater.*, 2018, **17**, 174.
10. B. M. Connolly, M. Aragonés-Anglada, J. Gandara-Loe, N. A. Danaf, D. C. Lamb, J. P. Mehta, D. Vulpe, S. Wuttke, J. Silvestre-Albero, P. Z. Moghadam, A. E. H. Wheatley and

D. Fairen-Jimenez, *Nat. Commun.*, 2019, **10**, 2345.

Table S3: Methane uptake working capacity for N-doped activated carbons compared to selected benchmark MOFs and carbons reported in the literature.

| Sample       | 65 bar               |                                     | 80 bar               |                                     | 100 bar              |                                     | Reference |
|--------------|----------------------|-------------------------------------|----------------------|-------------------------------------|----------------------|-------------------------------------|-----------|
|              | (g g <sup>-1</sup> ) | (cm <sup>3</sup> cm <sup>-3</sup> ) | (g g <sup>-1</sup> ) | (cm <sup>3</sup> cm <sup>-3</sup> ) | (g g <sup>-1</sup> ) | (cm <sup>3</sup> cm <sup>-3</sup> ) |           |
| DSM2800-1    | 0.17                 | 159                                 | 0.19                 | 177                                 | 0.21                 | 195                                 | This work |
| DSM4700-1    | 0.20                 | 159                                 | 0.22                 | 177                                 | 0.24                 | 196                                 | This work |
| DSU4800-1    | 0.27                 | 151                                 | 0.31                 | 171                                 | 0.34                 | 193                                 | This work |
| PPI-800-2    | 0.13                 | 174                                 | 0.14                 | 190                                 | 0.16                 | 212                                 | 1         |
| PPI-900-2    | 0.15                 | 183                                 | 0.17                 | 203                                 | 0.19                 | 231                                 | 1         |
| PPI-1000-2   | 0.17                 | 199                                 | 0.19                 | 222                                 | 0.21                 | 249                                 | 1         |
| CHCC2800     | 0.18                 | 200                                 | 0.20                 | 222                                 | 0.22                 | 246                                 | 2         |
| CHCC4700     | 0.20                 | 210                                 | 0.22                 | 234                                 | 0.25                 | 262                                 | 2         |
| CHCC4800     | 0.25                 | 197                                 | 0.28                 | 218                                 | 0.31                 | 248                                 | 2         |
| CNL4800      | 0.19                 | 182                                 | 0.22                 | 202                                 | 0.24                 | 224                                 | 3         |
| PPYCNL124    | 0.23                 | 167                                 | 0.26                 | 188                                 | 0.29                 | 209                                 | 3         |
| PPYCNL214    | 0.29                 | 146                                 | 0.34                 | 167                                 | 0.39                 | 192                                 | 4         |
| ACDS4800     | 0.18                 | 171                                 | 0.20                 | 189                                 | 0.22                 | 209                                 | 3,4       |
| PPYSD114     | 0.25                 | 162                                 | 0.28                 | 182                                 | 0.32                 | 205                                 | 4         |
| AX-21 carbon | 0.23                 | 155                                 | 0.26                 | 174                                 | 0.28                 | 190                                 | 5         |
| HKUST-1      | 0.15                 | 179                                 | 0.16                 | 198                                 | 0.17                 | 207                                 | 5         |
| Ni-MOF-74    | 0.08                 | 148                                 | 0.09                 | 152                                 | 0.10                 | 162                                 | 5         |
| Al-soc-MOF-1 | 0.36                 | 176                                 | 0.42                 | 201                                 |                      |                                     | 6         |
| MOF-210      | 0.38                 | 134                                 | 0.45                 | 157                                 |                      |                                     | 7         |
| NU-1500-Al   | 0.24                 | 165                                 | 0.26                 | 181                                 | 0.29                 | 202                                 | 8         |
| NU-1501-Fe   | 0.36                 | 151                                 | 0.42                 | 176                                 | 0.48                 | 201                                 | 8         |
| NU-1501-Al   | 0.37                 | 147                                 | 0.44                 | 174                                 | 0.50                 | 198                                 | 8         |
| monoHKUST-1  | 0.12                 | 184                                 | 0.13                 | 201                                 | 0.13                 | 198                                 | 9         |
| monoUiO-66_D | 0.11                 | 167                                 | 0.14                 | 202                                 | 0.17                 | 253                                 | 10        |

## References

1. I. Alali and R. Mokaya, *J. Mater. Chem. A*, 2023, **11**, 6952-6965.
2. I. Alali and R. Mokaya, *Energy Environ. Sci.*, 2022, **15**, 4710.
3. A. Altwala and R. Mokaya, *J. Mater. Chem. A*, 2022, **10**, 13744.
4. A. Altwala and R. Mokaya, *Energy Environ. Sci.*, 2020, **13**, 2967.
5. J. A. Mason, M. Veenstra and J. R. Long, *Chem. Sci.*, 2014, **5**, 32.
6. D. Alezi, *et al*, *J. Am. Chem. Soc.*, 2015, **137**, 13308.
7. H. Furukawa, *et al*, *Science* 2010, **329**, 424-428.
8. Z. Chen, *et al*, *Science*, 2020, **368**, 297.
9. T. Tian, Z. Zeng, D. Vulpe, M. E. Casco, G. Divitini, P. A. Midgley, J. Silvestre-Albero, J. C. Tan, P. Z. Moghadam and D. Fairen-Jimenez, *Nat. Mater.*, 2018, **17**, 174.
10. B. M. Connolly, M. Aragonés-Anglada, J. Gandara-Loe, N. A. Danaf, D. C. Lamb, J. P. Mehta, D. Vulpe, S. Wuttke, J. Silvestre-Albero, P. Z. Moghadam, A. E. H. Wheatley and D. Fairen-Jimenez, *Nat. Commun.*, 2019, **10**, 2345.

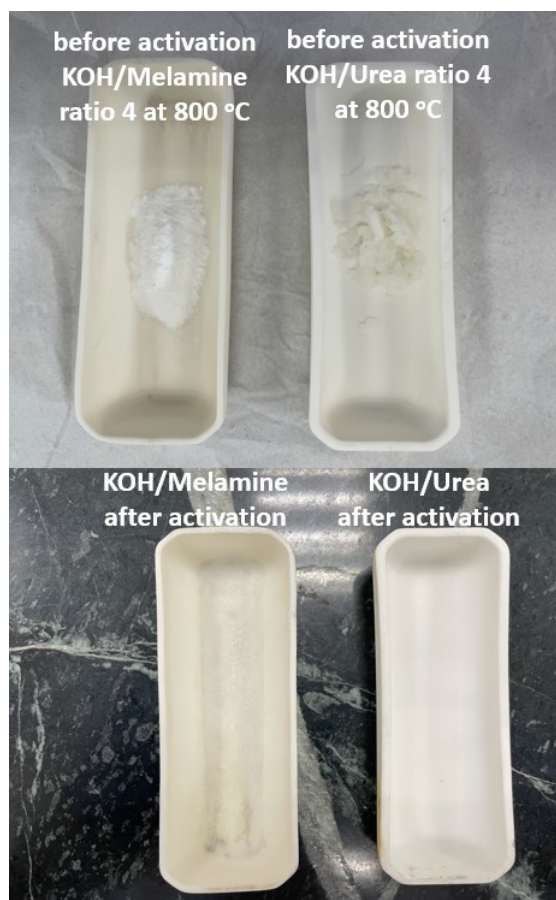

Supporting Figure 1. Photograph of the attempted activation of melamine and urea.

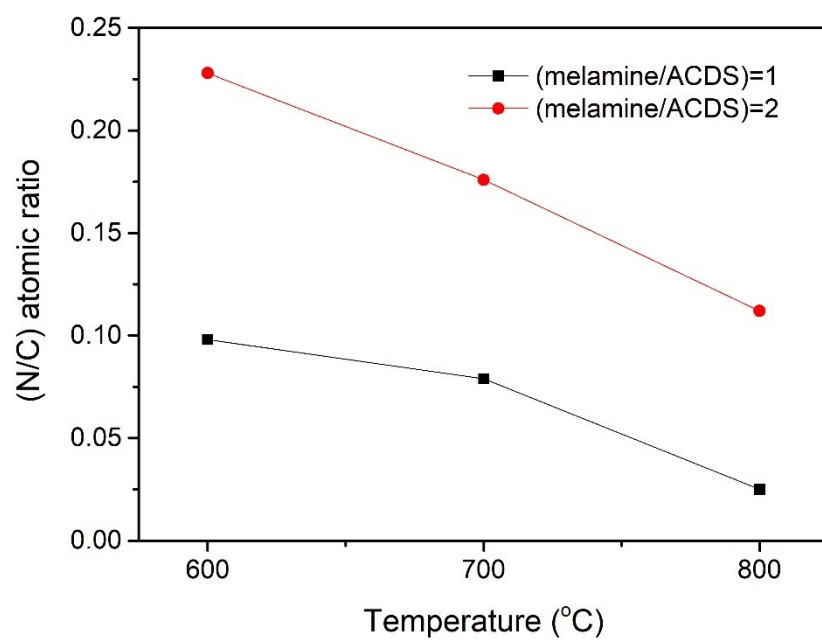

Supporting Figure 2. The N/C atomic ratio of activated carbons as a function of the activation temperature.

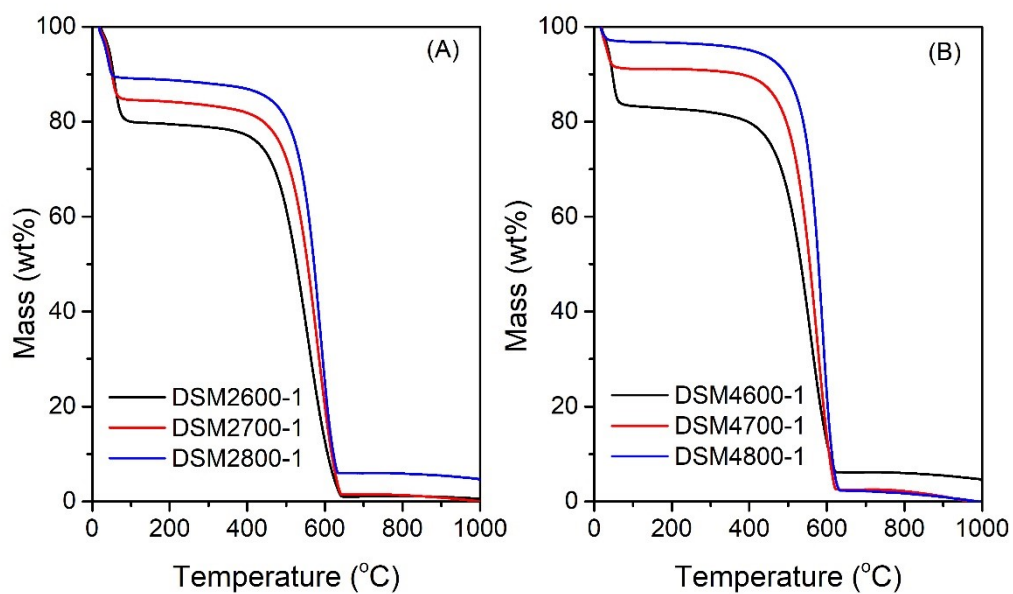

Supporting Figure 3. TGA curves of N-doped activated carbons prepared at KOH/ACDS ratio of 2 or 4 at 600, 700 or 800 °C and melamine/ACDS ratio of 1.

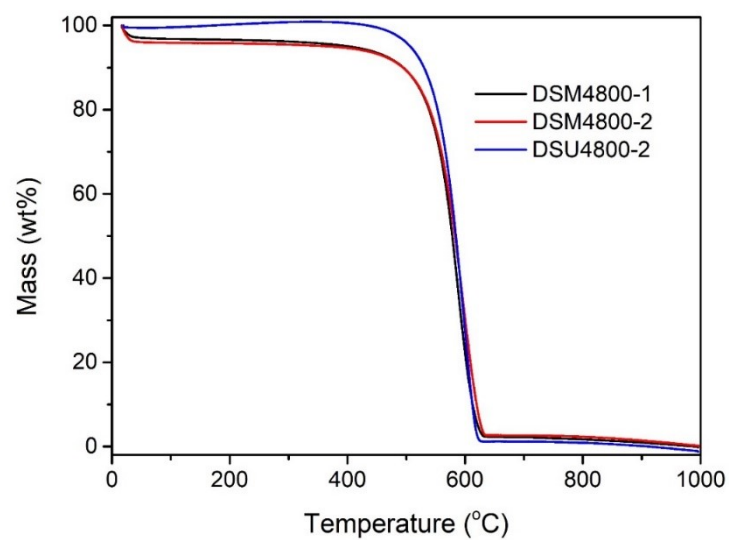

Supporting Figure 4. TGA curves of N-doped activated carbons prepared at 800 °C and KOH/ACDS ratio of 4 and various amounts of melamine or urea.



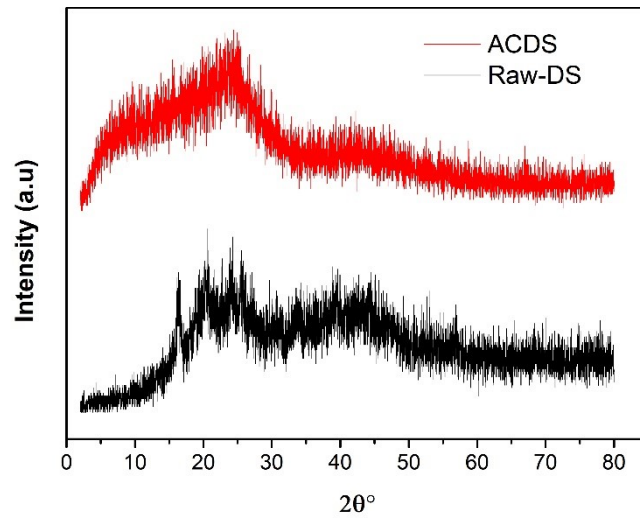

Supporting Figure 5. Powder XRD patterns of raw date seeds (Raw-DS) and air-carbonised dated seeds (ACDS).

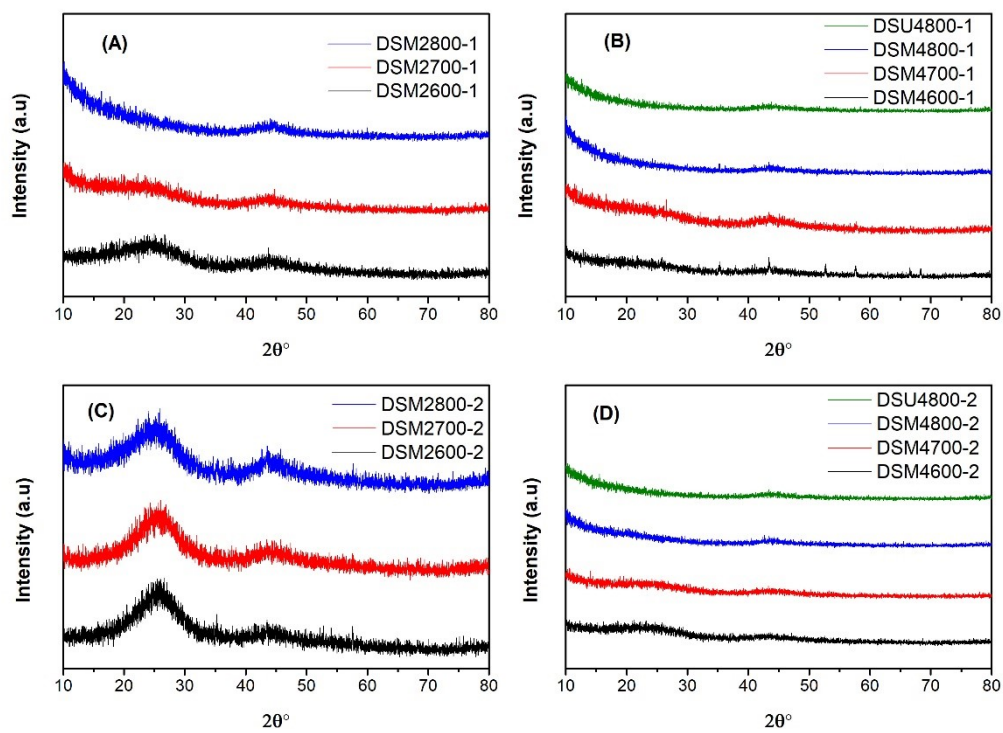

Supporting Figure 6. Powder XRD patterns of N-doped carbons activated at KOH/ACDS ratio 2 or 4 with melamine or urea as dopants.

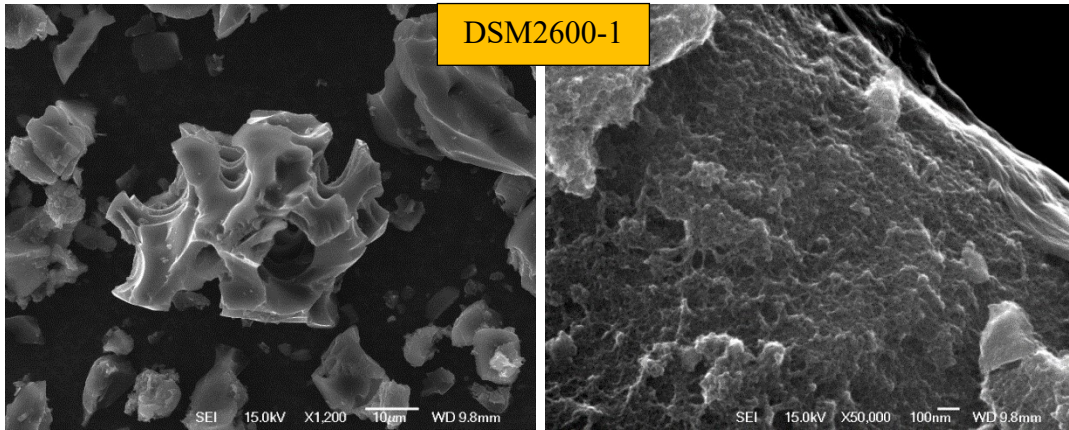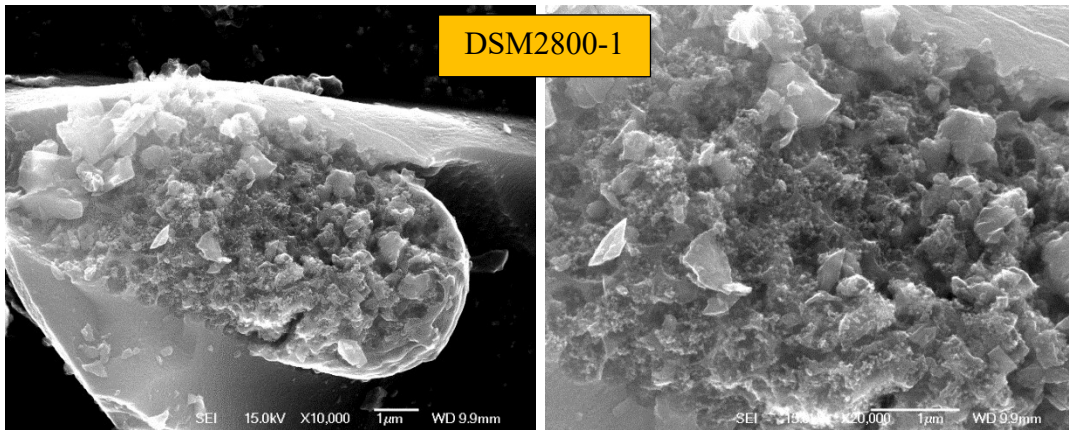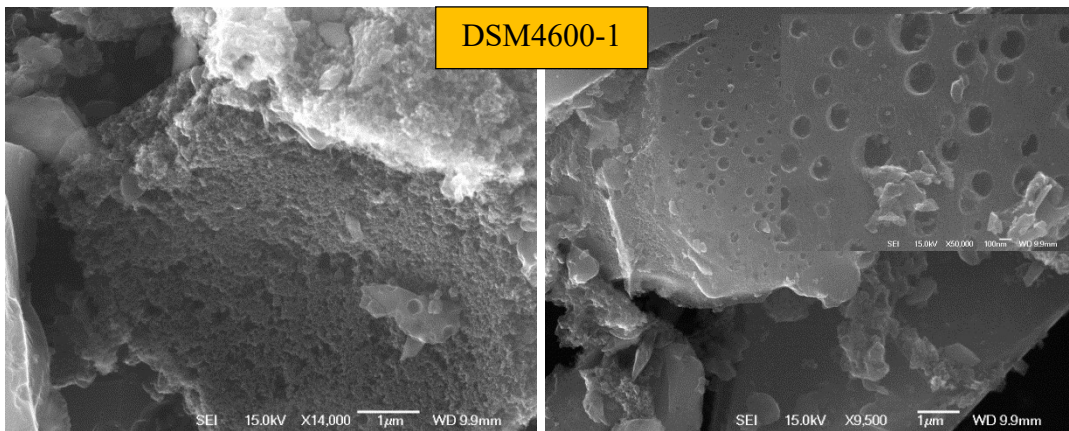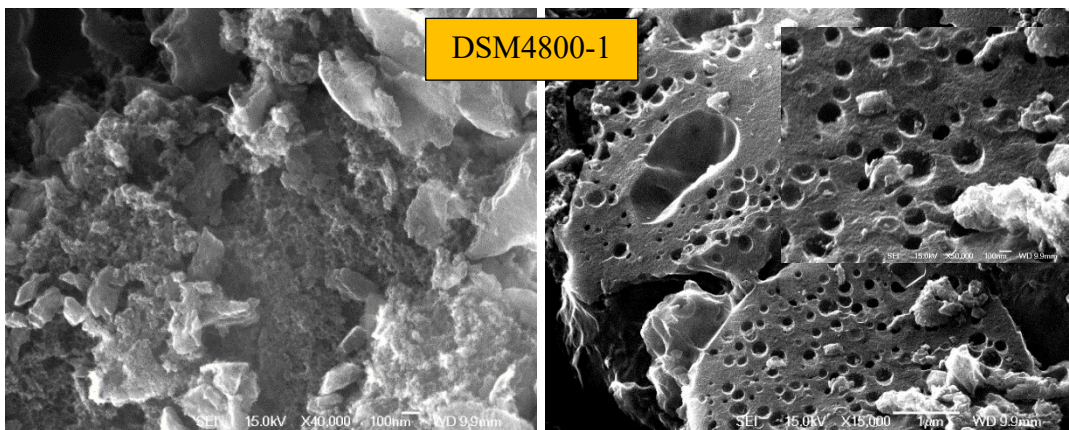

Supporting Figure 7. SEM images of selected N-doped activated carbons.

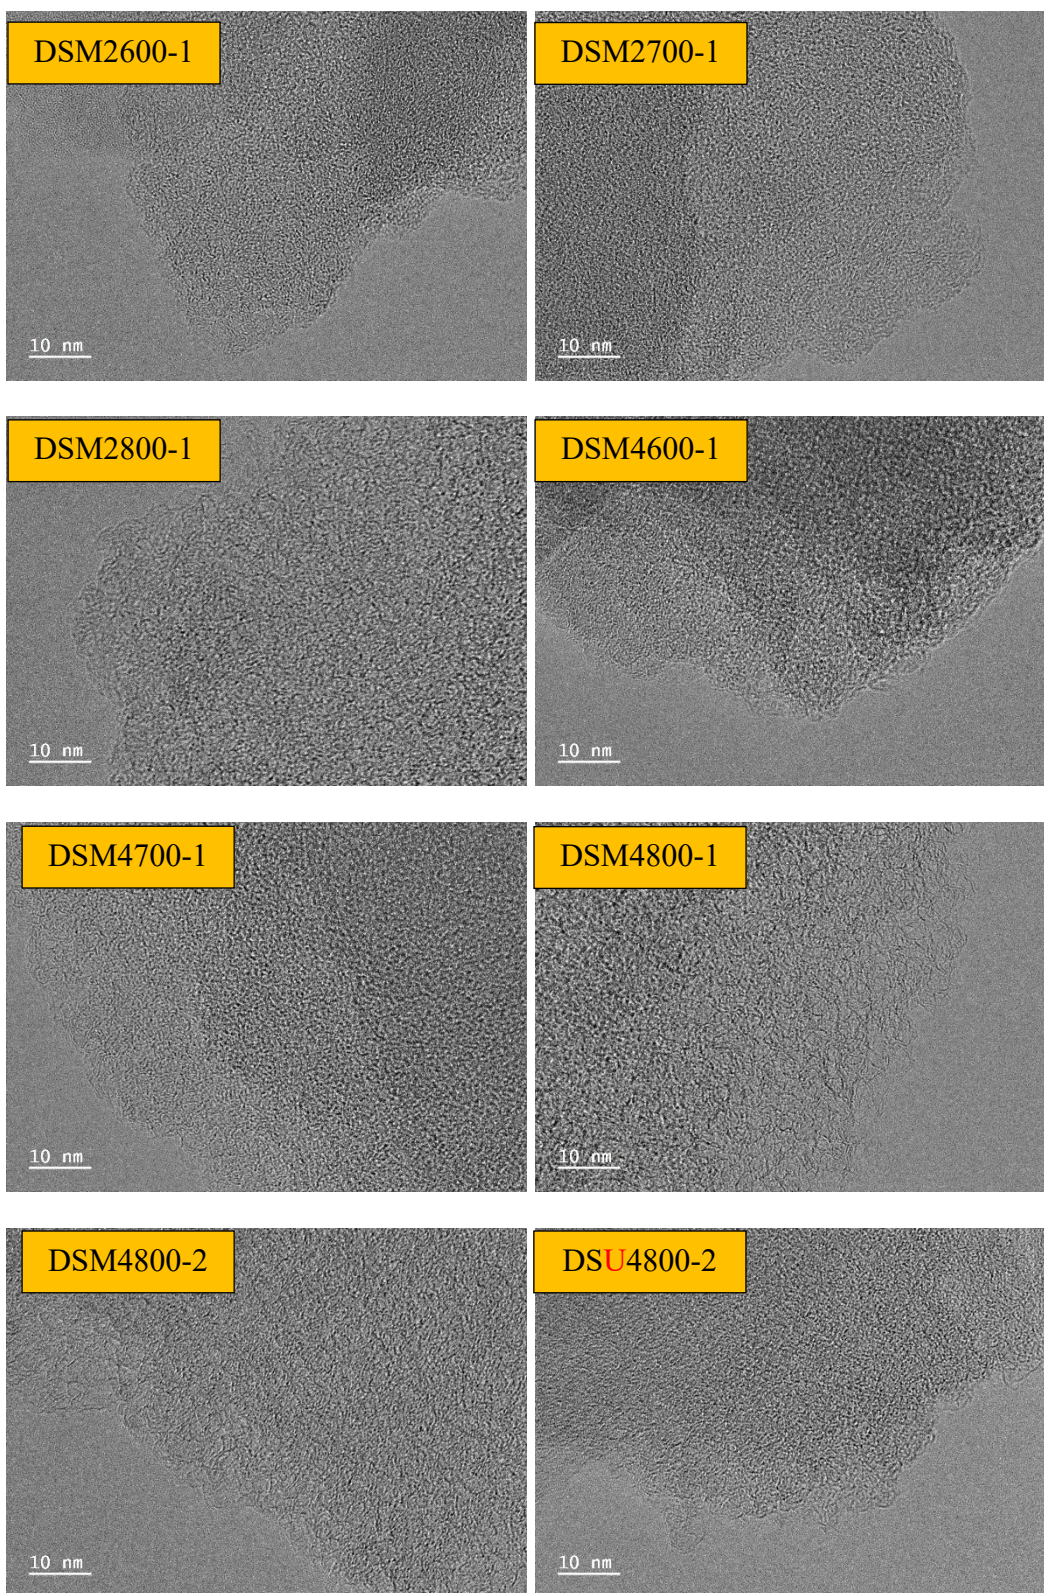

Supporting Figure 8. TEM images of selected N-doped activated carbons.

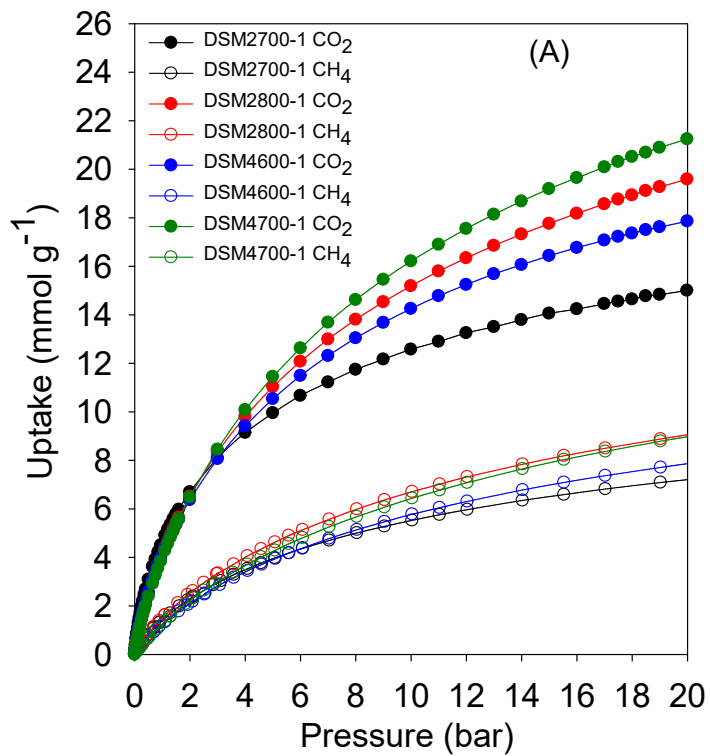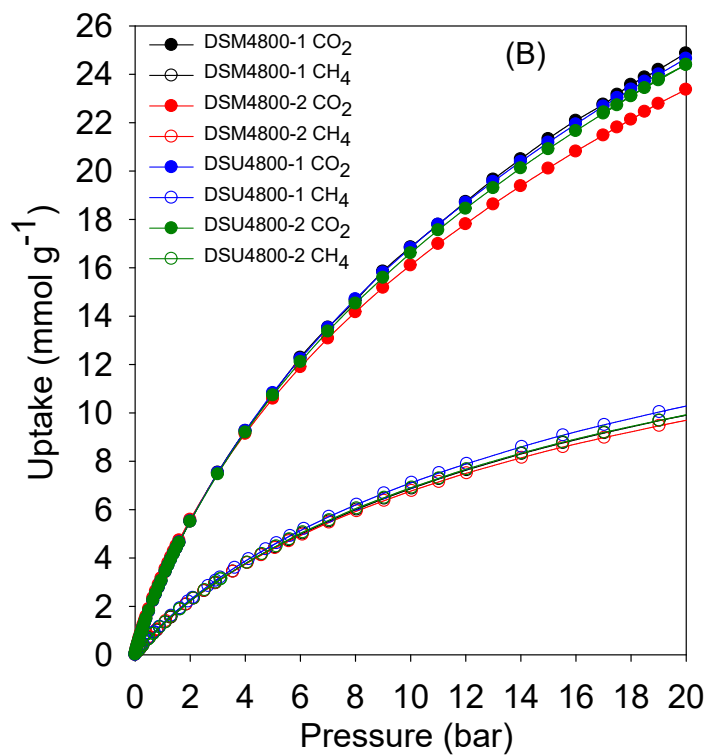

Supporting Figure 9. Excess CO<sub>2</sub> and methane uptake of N-doped carbons.
